# Supplementary material for: Vibrio parahaemolyticus in the Chesapeake Bay: Operational In Situ Prediction and Forecast Models Can Benefit from Inclusion of Lagged Water Quality Measurements
Source: PubMed Central journal article supplement (PMC6696964; doi:10.1128/aem.01007-19), 2019-08-14
Supplement: AEM.01007-19-s0001.pdf [file AEM.01007-19-s0001.pdf]

# Supplementary Material

**Table S1.** Model Specification for single parameter and combined/interaction model sets. Suffixes (e.g. “.0”) represent months lagged. Redundant model specifications (i.e. Models 4-6<sup>a</sup>, combined) are removed for clarity. Interaction models only specify interactions included.

| Model |                       | <u>Summer</u>          |                                   |                  |                     |                                                                         |                                                                                                    |                                                |
|-------|-----------------------|------------------------|-----------------------------------|------------------|---------------------|-------------------------------------------------------------------------|----------------------------------------------------------------------------------------------------|------------------------------------------------|
|       |                       | Temperature            | Salinity                          | Dissolved Oxygen | Secchi Disk         | Combined (parsimonious)                                                 | Interactions <sup>b</sup>                                                                          | Interactions (parsimonious)                    |
| 1     | Lag 0                 | WTEMP.0                | SALINITY.0 (sp) <sup>c</sup>      | DO.0 (sp)        | SECCHI.0            | WTEMP.0 + SALINITY.0 (sp) + DO.0 + SECCHI.0                             | DOQ.0:WTEMP.0 + SECCHI.0:SALINITYQ.0 + SALINITY.0:DOQ.0                                            | SECCHI.0:SALINITYQ.0 + SALINITY.0:DOQ.0        |
| 2     | Lag 1 + Lag 2         | WTEMP.1 + WTEMP.2      | SALINITY.1 (sp) + SALINITY.2 (sp) | DO.1 + DO.2      | SECCHI.1 + SECCHI.2 | SALINITY.1 (sp) + DO.1 + DO.2 + SECCHI.2                                | SALINITYQ.2:SALINITY.1 + SALINITY.2 (sp)*DO.2 + WTEMP.1*DO.0 + DOQ.0:WTEMP.0                       | SALINITYQ.2:SALINITY.1 + SALINITY.2 (sp) *DO.2 |
| 3     | Lag 0 + Lag 1 + Lag 2 | --                     | --                                | --               | --                  | WTEMP.0 + WTEMP.1 + SALINITY.0 (sp) + DO.0 + DO.1 + SECCHI.0 + SECCHI.2 | + SALINITYQ.2:SALINITY.1 + SALINITY.2 (sp)*DO.2 + SECCHI.0:SALINITYQ.0                             | SALINITYQ.2:SALINITY.1 + SECCHI.0:SALINITYQ.0  |
| Model |                       | <u>Autumn</u>          |                                   |                  |                     |                                                                         |                                                                                                    |                                                |
|       |                       | Temperature            | Salinity                          | Dissolved Oxygen | Secchi Disk         | Combined (parsimonious)                                                 | Interactions <sup>b</sup>                                                                          | Interactions (parsimonious)                    |
| 1     | Lag 0                 | WTEMP.0                | SALINITY.0 (sp)                   | DO.0 (sp)        | SECCHI.0            | SALINITY.0 (sp)+ DO.0 + SECCHI.0                                        | WTEMPQ.0 *DO.0 (sp) +                                                                              | WTEMPQ.0 *DO.0 (sp)                            |
| 2     | Lag 1 + Lag 2         | WTEMP.1 (sp) + WTEMP.2 | SALINITY.1 (sp) + SALINITY.2 (sp) | DO.1 + DO.2 (sp) | SECCHI.1 + SECCHI.2 | WTEMP.1 + SALINITY.1 + SALINITY.1 (sp) + DO.1 + SECCHI.2                | WTEMP.2*SALINITY.2 (sp) + SECCHIQ.1*WTEMP.1 (sp) + WTEMP.2*SALINITY.2 (sp) + WTEMPQ.0 *DO.0 (sp) + | WTEMP.2*SALINITY.2                             |
| 3     | Lag 0 + Lag 1 + Lag 2 | --                     | --                                | --               | --                  | SALINITY.0 (sp) + SALINITY.1 + DO.1 + DO.2 + SECCHI.0 + SECCHI.2        | SECCHIQ.1*WTEMP.1 (sp) + SECCHIQ.1*SECCHI.0                                                        | WTEMPQ.0 *DO.0 (sp) + WTEMP.2*SALINITY.2 (sp)  |

<sup>a</sup> Additive terms included in all Models 4-6 were: %water, dissolved organic nitrogen, dissolved organic phosphorous, nitrite, phosphate, chlorophyll-a, pheophytin, precipitation 1-day prior. Multiplicative terms included: temperature X salinity, Secchi X salinity, land use X dissolved oxygen, land use X phosphate.

<sup>b</sup> When a term includes “Q” the variable has been transformed into quartiles (e.g. DOQ.0)

<sup>c</sup> Spline term(s) included in the model

**Table S2A.** Akaike Information Criterion for cross-validation Tobit regression models

| Model |                                   | <u>Summer</u>              |                |                  |                 |                 |                 |
|-------|-----------------------------------|----------------------------|----------------|------------------|-----------------|-----------------|-----------------|
|       |                                   | Temperature                | Salinity       | Dissolved Oxygen | Secchi Disk     | Combined        | Interactions    |
|       |                                   | Median [IQR <sup>a</sup> ] |                |                  |                 |                 |                 |
| 0     | Null                              | 746 [734, 757]             | 763 [749, 774] | 752 [740, 766]   | 746 [734, 757]  | 719 [ 707, 730] | 719 [ 707, 730] |
| 1     | Lag 0                             | 732 [721, 743]             | 733 [721, 745] | 726 [715, 736]   | 737 [725, 749]  | 610 [601, 622]  | 604 [594, 615]  |
| 2     | Lag 1 + Lag 2                     | 740 [728, 751]             | 731 [717, 743] | 730 [717, 743]   | 741 [729, 753]  | 624 [614, 638]  | 612 [598, 623]  |
| 3     | Lag 0 + Lag 1 + Lag 2             | 733 [722, 745]             | 731 [717, 743] | 720 [708, 731]   | 740 [729, 752]  | 602 [592, 614]  | 591 [579, 602]  |
| 4     | Model 1 + Covariates <sup>b</sup> | --                         | --             | --               | --              | 528 [516, 539]  | 541 [527, 555]  |
| 5     | Model 2 + Covariates              | --                         | --             | --               | --              | 552 [540, 565]  | 552 [539, 567]  |
| 6     | Model 3 + Covariates              | --                         | --             | --               | --              | 537 [524, 549]  | 539 [525, 554]  |
| Model |                                   | <u>Autumn</u>              |                |                  |                 |                 |                 |
| 0     | Null                              | 600 [591, 609]             | 598 [589, 606] | 534 [546, 563]   | 574 [ 564, 583] | 527 [ 518, 535] | 527 [ 518, 535] |
| 1     | Lag 0                             | 597 [588, 605]             | 561 [551, 569] | 530 [521, 538]   | 560 [550, 569]  | 456 [448, 465]  | 449 [439, 458]  |
| 2     | Lag 1 + Lag 2                     | 589 [581, 597]             | 561 [552, 569] | 505 [498, 511]   | 567 [557, 577]  | 451 [443, 459]  | 456 [447, 463]  |
| 3     | Lag 0 + Lag 1 + Lag 2             | 589 [581, 597]             | 539 [529, 548] | 505 [499, 512]   | 563 [553, 572]  | 438 [428, 446]  | 441 [431, 450]  |
| 4     | Model 1 + Covariates              | --                         | --             | --               | --              | 424 [413, 434]  | 409 [397, 423]  |
| 5     | Model 2 + Covariates              | --                         | --             | --               | --              | 402 [391, 412]  | 401 [391, 412]  |
| 6     | Model 3 + Covariates              | --                         | --             | --               | --              | 397 [386, 407]  | 387 [370, 403]  |

<sup>a</sup> Interquartile Range; <sup>b</sup> covariates include additional environmental variables described in Table S1

**Table S2B.** Akaike Information Criterion for forecast Tobit regression models

| <b>Model</b> |                                   | Temperature   | Salinity | <u>Summer</u>    |                    |          |              |
|--------------|-----------------------------------|---------------|----------|------------------|--------------------|----------|--------------|
|              |                                   |               |          | Dissolved Oxygen | Secchi Disk Median | Combined | Interactions |
| 0            | Null                              | 634           | 655      | 657              | 634                | 627      | 627          |
| 1            | Lag 0                             | 626           | 623      | 623              | 619                | 515      | 515          |
| 2            | Lag 1 + Lag 2                     | 633           | 609      | 626              | 618                | 495      | 501          |
| 3            | Lag 0 + Lag 1 + Lag 2             | 629           | 608      | 619              | 619                | 492      | 493          |
| 4            | Model 1 + Covariates <sup>a</sup> | --            | --       | --               | --                 | 431      | 431          |
| 5            | Model 2 + Covariates              | --            | --       | --               | --                 | 416      | 426          |
| 6            | Model 3 + Covariates              | --            | --       | --               | --                 | 413      | 420          |
| <b>Model</b> |                                   | <u>Autumn</u> |          |                  |                    |          |              |
| 0            | Null                              | 550           | 549      | 481              | 515                | 445      | 445          |
| 1            | Lag 0                             | 545           | 509      | 456              | 494                | 373      | 374          |
| 2            | Lag 1 + Lag 2                     | 535           | 514      | 432              | 499                | 376      | 375          |
| 3            | Lag 0 + Lag 1 + Lag 2             | 530           | 508      | 433              | 497                | 370      | 368          |
| 4            | Model 1 + Covariates              | --            | --       | --               | --                 | 313      | 312          |
| 5            | Model 2 + Covariates              | --            | --       | --               | --                 | 306      | 308          |
| 6            | Model 3 + Covariates              | --            | --       | --               | --                 | 308      | 310          |

<sup>a</sup> covariates include additional environmental variables described in Table S1

**Table S3.** Cross-validation and forecast results for presence of *V. parahaemolyticus* (probability of quantification,  $\geq 1$  GE/ml) using water temperature, lagged at 0, 1 & 2-months.

| <b>Model</b>            |                       | <b>Summer</b>           |                         |                                                 |                         |                         |                         |
|-------------------------|-----------------------|-------------------------|-------------------------|-------------------------------------------------|-------------------------|-------------------------|-------------------------|
|                         |                       | AUC <sup>a</sup>        | AUC 2.5% <sup>b</sup>   | Optimal Threshold<br>Median [IQR <sup>c</sup> ] | Accuracy                | Sensitivity             | Specificity             |
| <u>Cross-validation</u> |                       |                         |                         |                                                 |                         |                         |                         |
| 1                       | Lag 0                 | 0.630<br>[0.607, 0.651] | 0.538<br>[0.511, 0.561] | 0.645<br>[0.609, 0.662]                         | 0.668<br>[0.545, 0.696] | 0.709<br>[0.477, 0.752] | 0.581<br>[0.512, 0.767] |
| 2                       | Lag 1 + Lag 2         | 0.574<br>[0.547, 0.598] | 0.471<br>[0.443, 0.498] | 0.603<br>[0.590, 0.619]                         | 0.544<br>[0.473, 0.600] | 0.504<br>[0.379, 0.596] | 0.730<br>[0.600, 0.821] |
| 3                       | Lag 0 + Lag 1 + Lag 2 | 0.609<br>[0.582, 0.634] | 0.509<br>[0.482, 0.536] | 0.613<br>[0.591, 0.635]                         | 0.582<br>[0.513, 0.653] | 0.553<br>[0.437, 0.674] | 0.680<br>[0.565, 0.804] |
| <u>Forecast</u>         |                       |                         |                         |                                                 |                         |                         |                         |
| 1                       | Lag 0                 | 0.485                   | 0.383                   | 0.680                                           | 0.472                   | 0.184                   | 0.902                   |
| 2                       | Lag 1 + Lag 2         | 0.554                   | 0.444                   | 0.704                                           | 0.570                   | 0.439                   | 0.780                   |
| 3                       | Lag 0 + Lag 1 + Lag 2 | 0.573                   | 0.462                   | 0.762                                           | 0.598                   | 0.424                   | 0.878                   |
|                         |                       | <b>Autumn</b>           |                         |                                                 |                         |                         |                         |
| <u>Cross-validation</u> |                       |                         |                         |                                                 |                         |                         |                         |
| 1                       | Lag 0                 | 0.566<br>[0.534, 0.594] | 0.464<br>[0.431, 0.494] | 0.599<br>[0.585, 0.613]                         | 0.452<br>[0.382, 0.515] | 0.356<br>[0.250, 0.462] | 0.848<br>[0.727, 0.939] |
| 2                       | Lag 1 + Lag 2         | 0.582<br>[0.542, 0.620] | 0.463<br>[0.424, 0.505] | 0.638<br>[0.621, 0.658]                         | 0.636<br>[0.513, 0.712] | 0.663<br>[0.468, 0.773] | 0.552<br>[0.433, 0.741] |
| 3                       | Lag 0 + Lag 1 + Lag 2 | 0.573<br>[0.511, 0.608] | 0.459<br>[0.394, 0.496] | 0.631<br>[0.609, 0.665]                         | 0.532<br>[0.437, 0.698] | 0.520<br>[0.331, 0.754] | 0.621<br>[0.467, 0.893] |
| <u>Forecast</u>         |                       |                         |                         |                                                 |                         |                         |                         |
| 1                       | Lag 0                 | 0.580                   | 0.477                   | 0.557                                           | 0.458                   | 0.186                   | 0.978                   |
| 2                       | Lag 1 + Lag 2         | 0.579                   | 0.459                   | 0.602                                           | 0.724                   | 0.848                   | 0.459                   |
| 3                       | Lag 0 + Lag 1 + Lag 2 | 0.569                   | 0.459                   | 0.577                                           | 0.483                   | 0.278                   | 0.919                   |

<sup>a</sup> Area Under Curve of Receiving Operating Characteristic; <sup>b</sup> Lower bound of 95% confidence interval from bootstrapped AUC; <sup>c</sup> Interquartile Range

**Table S4.** Cross-validation and forecast results for presence of *V. parahaemolyticus* (probability of quantification,  $\geq 1$  GE/ml) using salinity, lagged at 0, 1 & 2-months.

| <b>Model</b>            |                       | <b>Summer</b>           |                         |                                                 |                         |                         |                         |
|-------------------------|-----------------------|-------------------------|-------------------------|-------------------------------------------------|-------------------------|-------------------------|-------------------------|
|                         |                       | AUC <sup>a</sup>        | AUC 2.5% <sup>b</sup>   | Optimal Threshold<br>Median [IQR <sup>c</sup> ] | Accuracy                | Sensitivity             | Specificity             |
| <u>Cross-validation</u> |                       |                         |                         |                                                 |                         |                         |                         |
| 1                       | Lag 0                 | 0.700<br>[0.672, 0.722] | 0.612<br>[0.582, 0.635] | 0.615<br>[0.592, 0.640]                         | 0.558<br>[0.528, 0.595] | 0.452<br>[0.407, 0.508] | 0.919<br>[0.865, 0.946] |
| 2                       | Lag 1 + Lag 2         | 0.724<br>[0.699, 0.752] | 0.636<br>[0.609, 0.665] | 0.620<br>[0.585, 0.691]                         | 0.626<br>[0.564, 0.730] | 0.556<br>[0.460, 0.762] | 0.838<br>[0.649, 0.919] |
| 3                       | Lag 0 + Lag 1 + Lag 2 | 0.713<br>[0.687, 0.737] | 0.625<br>[0.596, 0.654] | 0.618<br>[0.586, 0.662]                         | 0.607<br>[0.558, 0.675] | 0.524<br>[0.452, 0.651] | 0.865<br>[0.757, 0.919] |
| <u>Forecast</u>         |                       |                         |                         |                                                 |                         |                         |                         |
| 1                       | Lag 0                 | 0.694                   | 0.591                   | 0.678                                           | 0.657                   | 0.492                   | 0.902                   |
| 2                       | Lag 1 + Lag 2         | 0.672                   | 0.567                   | 0.593                                           | 0.608                   | 0.393                   | 0.927                   |
| 3                       | Lag 0 + Lag 1 + Lag 2 | 0.675                   | 0.571                   | 0.630                                           | 0.627                   | 0.459                   | 0.878                   |
|                         |                       | <b>Autumn</b>           |                         |                                                 |                         |                         |                         |
| <u>Cross-validation</u> |                       |                         |                         |                                                 |                         |                         |                         |
| 1                       | Lag 0                 | 0.757<br>[0.727, 0.782] | 0.661<br>[0.626, 0.691] | 0.697<br>[0.674, 0.723]                         | 0.736<br>[0.709, 0.770] | 0.739<br>[0.706, 0.790] | 0.724<br>[0.690, 0.793] |
| 2                       | Lag 1 + Lag 2         | 0.740<br>[0.713, 0.765] | 0.650<br>[0.616, 0.680] | 0.642<br>[0.619, 0.671]                         | 0.628<br>[0.588, 0.682] | 0.571<br>[0.513, 0.647] | 0.862<br>[0.793, 0.931] |
| 3                       | Lag 0 + Lag 1 + Lag 2 | 0.801<br>[0.775, 0.824] | 0.718<br>[0.684, 0.750] | 0.680<br>[0.659, 0.716]                         | 0.723<br>[0.682, 0.757] | 0.689<br>[0.639, 0.748] | 0.828<br>[0.793, 0.897] |
| <u>Forecast</u>         |                       |                         |                         |                                                 |                         |                         |                         |
| 1                       | Lag 0                 | 0.747                   | 0.652                   | 0.598                                           | 0.691                   | 0.644                   | 0.784                   |
| 2                       | Lag 1 + Lag 2         | 0.775                   | 0.685                   | 0.592                                           | 0.736                   | 0.740                   | 0.730                   |
| 3                       | Lag 0 + Lag 1 + Lag 2 | 0.816                   | 0.732                   | 0.623                                           | 0.745                   | 0.726                   | 0.784                   |

<sup>a</sup> Area Under Curve of Receiving Operating Characteristic; <sup>b</sup> Lower bound of 95% confidence interval from bootstrapped AUC; <sup>c</sup> Interquartile Range

**Table S5.** Cross-validation and forecast results for presence of *V. parahaemolyticus* (probability of quantification,  $\geq 1$  GE/ml) using dissolved oxygen, lagged at 0, 1 & 2-months.

| Model                   |                       | <u>Summer</u>           |                         |                                                 |                         |                         |                         |
|-------------------------|-----------------------|-------------------------|-------------------------|-------------------------------------------------|-------------------------|-------------------------|-------------------------|
|                         |                       | AUC <sup>a</sup>        | AUC 2.5% <sup>b</sup>   | Optimal Threshold<br>Median [IQR <sup>c</sup> ] | Accuracy                | Sensitivity             | Specificity             |
| <u>Cross-validation</u> |                       |                         |                         |                                                 |                         |                         |                         |
| 1                       | Lag 0                 | 0.616<br>[0.573, 0.647] | 0.507<br>[0.457, 0.542] | 0.618<br>[0.605, 0.638]                         | 0.620<br>[0.546, 0.706] | 0.614<br>[0.490, 0.778] | 0.611<br>[0.444, 0.750] |
| 2                       | Lag 1 + Lag 2         | 0.676<br>[0.647, 0.705] | 0.577<br>[0.545, 0.610] | 0.632<br>[0.617, 0.651]                         | 0.650<br>[0.613, 0.687] | 0.630<br>[0.575, 0.685] | 0.722<br>[0.639, 0.778] |
| 3                       | Lag 0 + Lag 1 + Lag 2 | 0.669<br>[0.639, 0.700] | 0.567<br>[0.534, 0.600] | 0.632<br>[0.618, 0.651]                         | 0.626<br>[0.589, 0.673] | 0.598<br>[0.535, 0.669] | 0.722<br>[0.639, 0.799] |
| <u>Forecast</u>         |                       |                         |                         |                                                 |                         |                         |                         |
| 1                       | Lag 0                 | 0.577                   | 0.459                   | 0.663                                           | 0.515                   | 0.259                   | 0.897                   |
| 2                       | Lag 1 + Lag 2         | 0.631                   | 0.516                   | 0.695                                           | 0.649                   | 0.655                   | 0.641                   |
| 3                       | Lag 0 + Lag 1 + Lag 2 | 0.636                   | 0.520                   | 0.699                                           | 0.639                   | 0.621                   | 0.667                   |
| <u>Cross-validation</u> |                       |                         |                         |                                                 |                         |                         |                         |
|                         |                       | <u>Autumn</u>           |                         |                                                 |                         |                         |                         |
| 1                       | Lag 0                 | 0.649<br>[0.610, 0.683] | 0.514<br>[0.476, 0.551] | 0.706<br>[0.669, 0.735]                         | 0.775<br>[0.734, 0.803] | 0.843<br>[0.783, 0.887] | 0.481<br>[0.417, 0.556] |
| 2                       | Lag 1 + Lag 2         | 0.719<br>[0.683, 0.752] | 0.602<br>[0.561, 0.645] | 0.735<br>[0.715, 0.769]                         | 0.782<br>[0.746, 0.810] | 0.817<br>[0.765, 0.878] | 0.593<br>[0.519, 0.667] |
| 3                       | Lag 0 + Lag 1 + Lag 2 | 0.711<br>[0.677, 0.746] | 0.593<br>[0.553, 0.634] | 0.742<br>[0.718, 0.773]                         | 0.782<br>[0.739, 0.810] | 0.817<br>[0.765, 0.870] | 0.593<br>[0.519, 0.667] |
| <u>Forecast</u>         |                       |                         |                         |                                                 |                         |                         |                         |
| 1                       | Lag 0                 | 0.662                   | 0.545                   | 0.578                                           | 0.716                   | 0.810                   | 0.514                   |
| 2                       | Lag 1 + Lag 2         | 0.684                   | 0.578                   | 0.657                                           | 0.759                   | 0.937                   | 0.378                   |
| 3                       | Lag 0 + Lag 1 + Lag 2 | 0.690                   | 0.584                   | 0.677                                           | 0.784                   | 0.975                   | 0.378                   |

<sup>a</sup> Area Under Curve of Receiving Operating Characteristic; <sup>b</sup> Lower bound of 95% confidence interval from bootstrapped AUC; <sup>c</sup> Interquartile Range

**Table S6.** Cross-validation and forecast results for presence of *V. parahaemolyticus* (probability of quantification,  $\geq 1$  GE/ml) using Secchi disk depth, lagged at 0, 1 & 2-months.

| <b>Model</b>            |                       | <b>Summer</b>           |                         |                                                 |                         |                         |                         |
|-------------------------|-----------------------|-------------------------|-------------------------|-------------------------------------------------|-------------------------|-------------------------|-------------------------|
|                         |                       | AUC <sup>a</sup>        | AUC 2.5% <sup>b</sup>   | Optimal Threshold<br>Median [IQR <sup>c</sup> ] | Accuracy                | Sensitivity             | Specificity             |
| <u>Cross-validation</u> |                       |                         |                         |                                                 |                         |                         |                         |
| 1                       | Lag 0                 | 0.584<br>[0.555, 0.613] | 0.481<br>[0.452, 0.514] | 0.590<br>[0.568, 0.617]                         | 0.479<br>[0.394, 0.545] | 0.400<br>[0.246, 0.508] | 0.800<br>[0.629, 0.943] |
| 2                       | Lag 1 + Lag 2         | 0.573<br>[0.538, 0.600] | 0.472<br>[0.436, 0.500] | 0.587<br>[0.573, 0.608]                         | 0.479<br>[0.424, 0.521] | 0.392<br>[0.300, 0.475] | 0.829<br>[0.714, 0.907] |
| 3                       | Lag 0 + Lag 1 + Lag 2 | 0.572<br>[0.534, 0.601] | 0.469<br>[0.429, 0.499] | 0.596<br>[0.576, 0.624]                         | 0.491<br>[0.436, 0.545] | 0.408<br>[0.323, 0.515] | 0.771<br>[0.600, 0.886] |
| <u>Forecast</u>         |                       |                         |                         |                                                 |                         |                         |                         |
| 1                       | Lag 0                 | 0.518                   | 0.404                   | 0.709                                           | 0.543                   | 0.477                   | 0.650                   |
| 2                       | Lag 1 + Lag 2         | 0.547                   | 0.430                   | 0.685                                           | 0.581                   | 0.538                   | 0.650                   |
| 3                       | Lag 0 + Lag 1 + Lag 2 | 0.536                   | 0.419                   | 0.693                                           | 0.581                   | 0.523                   | 0.675                   |
| <u>Cross-validation</u> |                       |                         |                         |                                                 |                         |                         |                         |
|                         |                       | <b>Autumn</b>           |                         |                                                 |                         |                         |                         |
| 1                       | Lag 0                 | 0.637<br>[0.609, 0.663] | 0.539<br>[0.511, 0.568] | 0.588<br>[0.575, 0.603]                         | 0.490<br>[0.456, 0.531] | 0.395<br>[0.345, 0.437] | 0.929<br>[0.893, 0.964] |
| 2                       | Lag 1 + Lag 2         | 0.598<br>[0.567, 0.627] | 0.490<br>[0.457, 0.521] | 0.600<br>[0.582, 0.627]                         | 0.483<br>[0.435, 0.531] | 0.387<br>[0.319, 0.487] | 0.857<br>[0.714, 0.929] |
| 3                       | Lag 0 + Lag 1 + Lag 2 | 0.624<br>[0.594, 0.652] | 0.524<br>[0.492, 0.553] | 0.594<br>[0.577, 0.616]                         | 0.497<br>[0.456, 0.551] | 0.403<br>[0.336, 0.479] | 0.893<br>[0.821, 0.964] |
| <u>Forecast</u>         |                       |                         |                         |                                                 |                         |                         |                         |
| 1                       | Lag 0                 | 0.479                   | 0.370                   | 0.605                                           | 0.526                   | 0.442                   | 0.703                   |
| 2                       | Lag 1 + Lag 2         | 0.495                   | 0.385                   | 0.580                                           | 0.544                   | 0.481                   | 0.676                   |
| 3                       | Lag 0 + Lag 1 + Lag 2 | 0.501                   | 0.390                   | 0.658                                           | 0.465                   | 0.273                   | 0.865                   |

<sup>a</sup> Area Under Curve of Receiving Operating Characteristic; <sup>b</sup> Lower bound of 95% confidence interval from bootstrapped AUC; <sup>c</sup> Interquartile Range



**Table S7A.** Cross-validation results for presence of *V. parahaemolyticus* (probability of quantification,  $\geq 1$  GE/ml) using water temperature, salinity, dissolved oxygen, and Secchi disk depth with interaction terms lagged at 0, 1 & 2-months.

| <b>Model</b> |                                   | <b>Summer</b>           |                         |                                                 |                         |                         |                         |
|--------------|-----------------------------------|-------------------------|-------------------------|-------------------------------------------------|-------------------------|-------------------------|-------------------------|
|              |                                   | AUC <sup>a</sup>        | AUC 2.5% <sup>b</sup>   | Optimal Threshold<br>Median [IQR <sup>c</sup> ] | Accuracy                | Sensitivity             | Specificity             |
| 1            | Lag 0                             | 0.865<br>[0.843, 0.884] | 0.795<br>[0.766, 0.821] | 0.769<br>[0.731, 0.810]                         | 0.814<br>[0.788, 0.840] | 0.810<br>[0.769, 0.851] | 0.829<br>[0.771, 0.886] |
| 2            | Lag 1 + Lag 2                     | 0.868<br>[0.848, 0.886] | 0.799<br>[0.774, 0.823] | 0.717<br>[0.669, 0.779]                         | 0.788<br>[0.750, 0.827] | 0.769<br>[0.711, 0.835] | 0.857<br>[0.800, 0.914] |
| 3            | Lag 0 + Lag 1 + Lag 2             | 0.881<br>[0.858, 0.901] | 0.816<br>[0.787, 0.845] | 0.809<br>[0.762, 0.860]                         | 0.827<br>[0.795, 0.853] | 0.818<br>[0.777, 0.860] | 0.857<br>[0.800, 0.886] |
| 4            | Model 1 + Covariates <sup>d</sup> | 0.848<br>[0.824, 0.869] | 0.767<br>[0.736, 0.796] | 0.845<br>[0.796, 0.899]                         | 0.801<br>[0.766, 0.838] | 0.800<br>[0.746, 0.849] | 0.815<br>[0.759, 0.871] |
| 5            | Model 2 + Covariates              | 0.851<br>[0.831, 0.872] | 0.780<br>[0.754, 0.809] | 0.746<br>[0.691, 0.819]                         | 0.776<br>[0.730, 0.819] | 0.756<br>[0.688, 0.829] | 0.844<br>[0.774, 0.903] |
| 6            | Model 3 + Covariates              | 0.843<br>[0.815, 0.867] | 0.768<br>[0.731, 0.799] | 0.836<br>[0.759, 0.902]                         | 0.785<br>[0.750, 0.818] | 0.774<br>[0.723, 0.822] | 0.839<br>[0.774, 0.900] |
| <b>Model</b> |                                   | <b>Autumn</b>           |                         |                                                 |                         |                         |                         |
| 1            | Lag 0                             |                         |                         |                                                 |                         |                         |                         |
| 2            | Lag 1 + Lag 2                     | 0.840<br>[0.814, 0.860] | 0.758<br>[0.721, 0.787] | 0.762<br>[0.725, 0.807]                         | 0.761<br>[0.716, 0.799] | 0.731<br>[0.676, 0.796] | 0.846<br>[0.808, 0.923] |
| 3            | Lag 0 + Lag 1 + Lag 2             | 0.813<br>[0.786, 0.838] | 0.725<br>[0.691, 0.754] | 0.803<br>[0.758, 0.857]                         | 0.739<br>[0.687, 0.784] | 0.713<br>[0.639, 0.787] | 0.846<br>[0.731, 0.885] |
| 4            | Model 1 + Covariates              | 0.839<br>[0.813, 0.861] | 0.752<br>[0.718, 0.784] | 0.910<br>[0.841, 0.970]                         | 0.784<br>[0.731, 0.836] | 0.778<br>[0.704, 0.852] | 0.808<br>[0.731, 0.885] |
| 5            | Model 2 + Covariates              | 0.798<br>[0.764, 0.827] | 0.692<br>[0.646, 0.733] | 0.870<br>[0.798, 0.943]                         | 0.777<br>[0.717, 0.819] | 0.779<br>[0.695, 0.841] | 0.771<br>[0.682, 0.833] |
| 6            | Model 3 + Covariates              | 0.816<br>[0.788, 0.843] | 0.720<br>[0.683, 0.753] | 0.925<br>[0.870, 0.969]                         | 0.781<br>[0.732, 0.819] | 0.781<br>[0.711, 0.845] | 0.773<br>[0.696, 0.857] |

<sup>a</sup> Area Under Curve of Receiving Operating Characteristic; <sup>b</sup> Lower bound of 95% confidence interval from bootstrapped AUC; <sup>c</sup> Interquartile Range; <sup>d</sup> covariates include additional environmental variables described in Table S1

**Table S7B.** Forecasting results for presence of *V. parahaemolyticus* (probability of quantification,  $\geq 1$  GE/ml) using water temperature, salinity, dissolved oxygen, and Secchi disk depth with interaction terms lagged at 0, 1 & 2-months.

|              |                                   | <u>Summer</u>    |                       |                   |          |             |             |
|--------------|-----------------------------------|------------------|-----------------------|-------------------|----------|-------------|-------------|
|              |                                   | AUC <sup>a</sup> | AUC 2.5% <sup>b</sup> | Optimal Threshold | Accuracy | Sensitivity | Specificity |
| <b>Model</b> |                                   |                  |                       |                   |          |             |             |
| 1            | Lag 0                             | 0.810            | 0.720                 | 0.926             | 0.781    | 0.862       | 0.658       |
| 2            | Lag 1 + Lag 2                     | 0.765            | 0.667                 | 0.735             | 0.688    | 0.569       | 0.868       |
| 3            | Lag 0 + Lag 1 + Lag 2             | 0.822            | 0.734                 | 0.922             | 0.802    | 0.828       | 0.763       |
| 4            | Model 1 + Covariates <sup>c</sup> | 0.760            | 0.658                 | 0.990             | 0.763    | 0.821       | 0.676       |
| 5            | Model 2 + Covariates              | 0.737            | 0.636                 | 0.899             | 0.699    | 0.679       | 0.730       |
| 6            | Model 3 + Covariates              | 0.734            | 0.633                 | 0.918             | 0.688    | 0.643       | 0.757       |
|              |                                   | <u>Autumn</u>    |                       |                   |          |             |             |
| <b>Model</b> |                                   |                  |                       |                   |          |             |             |
| 1            | Lag 0                             | 0.810            | 0.720                 | 0.926             | 0.781    | 0.862       | 0.658       |
| 2            | Lag 1 + Lag 2                     | 0.765            | 0.667                 | 0.735             | 0.688    | 0.569       | 0.868       |
| 3            | Lag 0 + Lag 1 + Lag 2             | 0.822            | 0.734                 | 0.922             | 0.802    | 0.828       | 0.763       |
| 4            | Model 1 + Covariates              | 0.760            | 0.658                 | 0.990             | 0.763    | 0.821       | 0.676       |
| 5            | Model 2 + Covariates              | 0.737            | 0.636                 | 0.899             | 0.699    | 0.679       | 0.730       |
| 6            | Model 3 + Covariates              | 0.734            | 0.633                 | 0.918             | 0.688    | 0.643       | 0.757       |

<sup>a</sup> Area Under Curve of Receiving Operating Characteristic; <sup>b</sup> Lower bound of 95% confidence interval from bootstrapped AUC; <sup>c</sup> covariates include additional environmental variables described in Table S1

**Table S8A.** Cross-validation results for presence of *V. parahaemolyticus* (probability of quantification,  $\geq 1$  GE/ml) using water temperature, salinity, dissolved oxygen, and Secchi disk depth (parsimonious model) lagged at 0, 1 & 2-months.

| Model |                                   | <u>Summer</u>           |                         |                                                 |                         |                         |                         |
|-------|-----------------------------------|-------------------------|-------------------------|-------------------------------------------------|-------------------------|-------------------------|-------------------------|
|       |                                   | AUC <sup>a</sup>        | AUC 2.5% <sup>b</sup>   | Optimal Threshold<br>Median [IQR <sup>c</sup> ] | Accuracy                | Sensitivity             | Specificity             |
| 1     | Lag 0                             | 0.856<br>[0.836, 0.872] | 0.784<br>[0.758, 0.807] | 0.711<br>[0.688, 0.751]                         | 0.782<br>[0.756, 0.808] | 0.752<br>[0.719, 0.802] | 0.857<br>[0.800, 0.914] |
| 2     | Lag 1 + Lag 2                     | 0.852<br>[0.831, 0.870] | 0.783<br>[0.755, 0.807] | 0.676<br>[0.645, 0.719]                         | 0.769<br>[0.731, 0.801] | 0.736<br>[0.680, 0.793] | 0.886<br>[0.800, 0.914] |
| 3     | Lag 0 + Lag 1 + Lag 2             | 0.870<br>[0.850, 0.888] | 0.804<br>[0.779, 0.828] | 0.730<br>[0.689, 0.769]                         | 0.795<br>[0.763, 0.827] | 0.769<br>[0.719, 0.818] | 0.857<br>[0.829, 0.914] |
| 4     | Model 1 + Covariates <sup>d</sup> | 0.855<br>[0.833, 0.875] | 0.784<br>[0.754, 0.808] | 0.755<br>[0.715, 0.807]                         | 0.789<br>[0.747, 0.821] | 0.778<br>[0.716, 0.829] | 0.833<br>[0.774, 0.890] |
| 5     | Model 2 + Covariates              | 0.856<br>[0.835, 0.877] | 0.790<br>[0.763, 0.814] | 0.705<br>[0.664, 0.766]                         | 0.771<br>[0.730, 0.813] | 0.742<br>[0.675, 0.816] | 0.871<br>[0.793, 0.931] |
| 6     | Model 3 + Covariates              | 0.866<br>[0.845, 0.886] | 0.796<br>[0.768, 0.826] | 0.764<br>[0.724, 0.809]                         | 0.797<br>[0.769, 0.830] | 0.786<br>[0.740, 0.833] | 0.844<br>[0.794, 0.900] |
| Model |                                   | <u>Autumn</u>           |                         |                                                 |                         |                         |                         |
| 1     | Lag 0                             | 0.830<br>[0.811, 0.853] | 0.748<br>[0.721, 0.776] | 0.710<br>[0.677, 0.779]                         | 0.739<br>[0.701, 0.799] | 0.704<br>[0.657, 0.806] | 0.846 [0.769,<br>0.923] |
| 2     | Lag 1 + Lag 2                     | 0.824<br>[0.799, 0.850] | 0.737<br>[0.705, 0.769] | 0.787<br>[0.746, 0.830]                         | 0.769<br>[0.711, 0.821] | 0.769<br>[0.676, 0.843] | 0.808 [0.692,<br>0.885] |
| 3     | Lag 0 + Lag 1 + Lag 2             | 0.859<br>[0.838, 0.881] | 0.783<br>[0.756, 0.813] | 0.799<br>[0.762, 0.835]                         | 0.806<br>[0.769, 0.836] | 0.796<br>[0.741, 0.843] | 0.846 [0.808,<br>0.885] |
| 4     | Model 1 + Covariates              | 0.804<br>[0.779, 0.833] | 0.705<br>[0.675, 0.742] | 0.746<br>[0.698, 0.804]                         | 0.756<br>[0.706, 0.802] | 0.748<br>[0.676, 0.822] | 0.783 [0.696,<br>0.864] |
| 5     | Model 2 + Covariates              | 0.829<br>[0.800, 0.852] | 0.735<br>[0.696, 0.766] | 0.864<br>[0.803, 0.910]                         | 0.806<br>[0.762, 0.843] | 0.816<br>[0.750, 0.873] | 0.773 [0.696,<br>0.833] |
| 6     | Model 3 + Covariates              | 0.846<br>[0.820, 0.870] | 0.760<br>[0.727, 0.791] | 0.823<br>[0.783, 0.870]                         | 0.788<br>[0.746, 0.827] | 0.775<br>[0.722, 0.837] | 0.833<br>[0.775, 0.905] |

<sup>a</sup> Area Under Curve of Receiving Operating Characteristic; <sup>b</sup> Lower bound of 95% confidence interval from bootstrapped AUC; <sup>c</sup> Interquartile Range; <sup>d</sup> covariates include additional environmental variables described in Table S1

**Table S8B.** Forecasting results for presence of *V. parahaemolyticus* (probability of quantification,  $\geq 1$  GE/ml) using water temperature, salinity, dissolved oxygen, and Secchi disk depth (parsimonious model) lagged at 0, 1 & 2-months.

|              |                                   | <u>Summer</u>    |                       |                   |          |             |             |
|--------------|-----------------------------------|------------------|-----------------------|-------------------|----------|-------------|-------------|
|              |                                   | AUC <sup>a</sup> | AUC 2.5% <sup>b</sup> | Optimal Threshold | Accuracy | Sensitivity | Specificity |
| <b>Model</b> |                                   |                  |                       |                   |          |             |             |
| 1            | Lag 0                             | 0.810            | 0.721                 | 0.749             | 0.729    | 0.603       | 0.921       |
| 2            | Lag 1 + Lag 2                     | 0.742            | 0.639                 | 0.870             | 0.729    | 0.810       | 0.605       |
| 3            | Lag 0 + Lag 1 + Lag 2             | 0.784            | 0.689                 | 0.761             | 0.719    | 0.638       | 0.842       |
| 4            | Model 1 + Covariates <sup>c</sup> | 0.809            | 0.721                 | 0.749             | 0.720    | 0.571       | 0.946       |
| 5            | Model 2 + Covariates              | 0.734            | 0.632                 | 0.753             | 0.667    | 0.536       | 0.865       |
| 6            | Model 3 + Covariates              | 0.796            | 0.705                 | 0.894             | 0.731    | 0.750       | 0.703       |
|              |                                   | <u>Autumn</u>    |                       |                   |          |             |             |
| <b>Model</b> |                                   |                  |                       |                   |          |             |             |
| 1            | Lag 0                             | 0.849            | 0.776                 | 0.585             | 0.771    | 0.736       | 0.838       |
| 2            | Lag 1 + Lag 2                     | 0.841            | 0.768                 | 0.583             | 0.706    | 0.556       | 1.000       |
| 3            | Lag 0 + Lag 1 + Lag 2             | 0.808            | 0.725                 | 0.714             | 0.761    | 0.792       | 0.703       |
| 4            | Model 1 + Covariates              | 0.814            | 0.724                 | 0.577             | 0.769    | 0.775       | 0.757       |
| 5            | Model 2 + Covariates              | 0.805            | 0.716                 | 0.765             | 0.806    | 0.915       | 0.595       |
| 6            | Model 3 + Covariates              | 0.809            | 0.723                 | 0.676             | 0.759    | 0.803       | 0.676       |

<sup>a</sup> Area Under Curve of Receiving Operating Characteristic; <sup>b</sup> Lower bound of 95% confidence interval from bootstrapped AUC; <sup>c</sup> covariates include additional environmental variables described in Table S1

**Table S9A.** Cross-validation results for presence of *V. parahaemolyticus* (probability of quantification,  $\geq 1$  GE/ml) using water temperature, salinity, dissolved oxygen, and Secchi disk depth with interaction terms (parsimonious model) lagged at 0, 1 & 2-months.

| Model |                                   | <u>Summer</u>           |                         |                                                 |                         |                         |                         |
|-------|-----------------------------------|-------------------------|-------------------------|-------------------------------------------------|-------------------------|-------------------------|-------------------------|
|       |                                   | AUC <sup>a</sup>        | AUC 2.5% <sup>b</sup>   | Optimal Threshold<br>Median [IQR <sup>c</sup> ] | Accuracy                | Sensitivity             | Specificity             |
| 1     | Lag 0                             | 0.873<br>[0.853, 0.891] | 0.806<br>[0.777, 0.831] | 0.765<br>[0.731, 0.802]                         | 0.821<br>[0.788, 0.846] | 0.810<br>[0.769, 0.860] | 0.857<br>[0.800, 0.886] |
| 2     | Lag 1 + Lag 2                     | 0.871<br>[0.851, 0.888] | 0.806<br>[0.780, 0.828] | 0.719<br>[0.672, 0.767]                         | 0.788<br>[0.756, 0.821] | 0.769<br>[0.719, 0.826] | 0.857<br>[0.800, 0.914] |
| 3     | Lag 0 + Lag 1 + Lag 2             | 0.885<br>[0.867, 0.900] | 0.822<br>[0.798, 0.844] | 0.787<br>[0.746, 0.832]                         | 0.821<br>[0.795, 0.846] | 0.818<br>[0.769, 0.851] | 0.857<br>[0.800, 0.914] |
| 4     | Model 1 + Covariates <sup>d</sup> | 0.848<br>[0.821, 0.869] | 0.766<br>[0.735, 0.795] | 0.839<br>[0.784, 0.887]                         | 0.805 [0.770,<br>0.833] | 0.802<br>[0.750, 0.847] | 0.826<br>[0.760, 0.871] |
| 5     | Model 2 + Covariates              | 0.848<br>[0.829, 0.869] | 0.778<br>[0.751, 0.803] | 0.747<br>[0.696, 0.823]                         | 0.775 [0.719,<br>0.817] | 0.754<br>[0.678, 0.834] | 0.839<br>[0.750, 0.903] |
| 6     | Model 3 + Covariates              | 0.843<br>[0.819, 0.864] | 0.763<br>[0.731, 0.790] | 0.826<br>[0.760, 0.883]                         | 0.799 [0.764,<br>0.822] | 0.788<br>[0.738, 0.832] | 0.833<br>[0.769, 0.875] |
| Model |                                   | <u>Autumn</u>           |                         |                                                 |                         |                         |                         |
| 1     | Lag 0                             | 0.840<br>[0.814, 0.860] | 0.758<br>[0.721, 0.787] | 0.762<br>[0.725, 0.807]                         | 0.761<br>[0.716, 0.799] | 0.731<br>[0.676, 0.796] | 0.846<br>[0.808, 0.923] |
| 2     | Lag 1 + Lag 2                     | 0.825<br>[0.800, 0.849] | 0.741<br>[0.709, 0.773] | 0.788<br>[0.751, 0.823]                         | 0.754<br>[0.709, 0.799] | 0.741<br>[0.676, 0.806] | 0.808<br>[0.731, 0.885] |
| 3     | Lag 0 + Lag 1 + Lag 2             | 0.857<br>[0.834, 0.879] | 0.778<br>[0.747, 0.811] | 0.864<br>[0.811, 0.924]                         | 0.784<br>[0.739, 0.821] | 0.769<br>[0.704, 0.815] | 0.846<br>[0.808, 0.923] |
| 4     | Model 1 + Covariates              | 0.798<br>[0.764, 0.827] | 0.692<br>[0.646, 0.733] | 0.870<br>[0.798, 0.943]                         | 0.777<br>[0.717, 0.819] | 0.779<br>[0.695, 0.841] | 0.771<br>[0.682, 0.833] |
| 5     | Model 2 + Covariates              | 0.817<br>[0.790, 0.846] | 0.720<br>[0.685, 0.755] | 0.894<br>[0.845, 0.940]                         | 0.803<br>[0.758, 0.843] | 0.819<br>[0.751, 0.879] | 0.739<br>[0.654, 0.833] |
| 6     | Model 3 + Covariates              | 0.822<br>[0.787, 0.853] | 0.725<br>[0.680, 0.764] | 0.963<br>[0.897, 0.993]                         | 0.792<br>[0.743, 0.833] | 0.797<br>[0.724, 0.858] | 0.783<br>[0.696, 0.864] |

<sup>a</sup> Area Under Curve of Receiving Operating Characteristic; <sup>b</sup> Lower bound of 95% confidence interval from bootstrapped AUC; <sup>c</sup> Interquartile Range; <sup>d</sup> covariates include additional environmental variables described in Table S1

**Table S9B.** Forecasting results for presence of *V. parahaemolyticus* (probability of quantification,  $\geq 1$  GE/ml) using water temperature, salinity, dissolved oxygen, and Secchi disk depth with interaction terms (parsimonious model) lagged at 0, 1 & 2-months.

|              |                                   | <u>Summer</u>    |                       |                   |          |             |             |
|--------------|-----------------------------------|------------------|-----------------------|-------------------|----------|-------------|-------------|
| <b>Model</b> |                                   | AUC <sup>a</sup> | AUC 2.5% <sup>b</sup> | Optimal Threshold | Accuracy | Sensitivity | Specificity |
| 1            | Lag 0                             | 0.817            | 0.729                 | 0.894             | 0.781    | 0.828       | 0.711       |
| 2            | Lag 1 + Lag 2                     | 0.769            | 0.672                 | 0.897             | 0.729    | 0.776       | 0.658       |
| 3            | Lag 0 + Lag 1 + Lag 2             | 0.805            | 0.715                 | 0.872             | 0.740    | 0.690       | 0.816       |
| 4            | Model 1 + Covariates <sup>c</sup> | 0.770            | 0.670                 | 0.970             | 0.742    | 0.768       | 0.703       |
| 5            | Model 2 + Covariates              | 0.727            | 0.624                 | 0.848             | 0.667    | 0.571       | 0.811       |
| 6            | Model 3 + Covariates              | 0.800            | 0.707                 | 0.983             | 0.763    | 0.804       | 0.703       |
|              |                                   | <u>Autumn</u>    |                       |                   |          |             |             |
| <b>Model</b> |                                   | AUC <sup>a</sup> | AUC 2.5% <sup>b</sup> | Optimal Threshold | Accuracy | Sensitivity | Specificity |
| 1            | Lag 0                             | 0.529            | 0.403                 | 0.918             | 0.716    | 0.958       | 0.243       |
| 2            | Lag 1 + Lag 2                     | 0.868            | 0.802                 | 0.586             | 0.716    | 0.569       | 1.000       |
| 3            | Lag 0 + Lag 1 + Lag 2             | 0.533            | 0.411                 | 1.000             | 0.716    | 0.972       | 0.216       |
| 4            | Model 1 + Covariates              | 0.630            | 0.515                 | 0.999             | 0.731    | 0.930       | 0.351       |
| 5            | Model 2 + Covariates              | 0.772            | 0.666                 | 0.733             | 0.806    | 0.887       | 0.649       |
| 6            | Model 3 + Covariates              | 0.696            | 0.597                 | 0.540             | 0.639    | 0.563       | 0.784       |

<sup>a</sup> Area Under Curve of Receiving Operating Characteristic; <sup>b</sup> Lower bound of 95% confidence interval from bootstrapped AUC; <sup>c</sup> covariates include additional environmental variables described in Table S1

**Table S10.** Prediction results for log10-abundance of *V. parahaemolyticus* (unconditional expectation) using water temperature lagged at 0, 1 & 2-months.

| <b>Model</b> |                       | <b>Summer</b>              |                                |                         |                    |       |                      |      |
|--------------|-----------------------|----------------------------|--------------------------------|-------------------------|--------------------|-------|----------------------|------|
|              |                       | RMSE <sup>a</sup>          | <u>Random Cross-Validation</u> |                         | CV-R2 <sup>c</sup> | RMSE  | <u>2010 Forecast</u> |      |
|              |                       |                            | MPSE <sup>b</sup>              | MPSE                    |                    |       | CV-R2                | MPSE |
|              |                       | Median [IQR <sup>d</sup> ] | Median [IQR]                   | Median [IQR]            |                    |       |                      |      |
| 1            | Lag 0                 | 0.380 [0.368, 0.394]       | 0.056 [0.054, 0.059]           | -0.049 [-0.096, -0.020] | 0.548              | 0.063 | 0.013                |      |
| 2            | Lag 1 + Lag 2         | 0.378 [0.362, 0.393]       | 0.059 [0.057, 0.061]           | 0.039 [-0.004, 0.086]   | 0.551              | 0.058 | 0.160                |      |
| 3            | Lag 0 + Lag 1 + Lag 2 | 0.375 [0.360, 0.389]       | 0.067 [0.064, 0.070]           | 0.057 [0.007, 0.101]    | 0.549              | 0.075 | 0.167                |      |
| <b>Model</b> |                       | <b>Autumn</b>              |                                |                         |                    |       |                      |      |
|              |                       | RMSE                       | <u>Random Cross-Validation</u> |                         | CV-R2              | RMSE  | <u>2010 Forecast</u> |      |
|              |                       |                            | MPSE                           | MPSE                    |                    |       | CV-R2                | MPSE |
|              |                       | Median [IQR]               | Median [IQR]                   | Median [IQR]            |                    |       |                      |      |
| 1            | Lag 0                 | 0.349 [0.338, 0.359]       | 0.052 [0.051, 0.053]           | -0.151 [-0.186, -0.118] | 0.424              | 0.037 | -0.100               |      |
| 2            | Lag 1 + Lag 2         | 0.331 [0.321, 0.342]       | 0.067 [0.062, 0.074]           | 0.026 [-0.046, 0.092]   | 0.398              | 0.046 | 0.141                |      |
| 3            | Lag 0 + Lag 1 + Lag 2 | 0.331 [0.320, 0.342]       | 0.072 [0.067, 0.079]           | 0.027 [-0.049, 0.093]   | 0.396              | 0.044 | 0.150                |      |

<sup>a</sup> Root-Mean-Squared-Error; <sup>b</sup> Mean Prediction Standard Error; <sup>c</sup> Cross-validation R<sup>2</sup>; <sup>d</sup> Interquartile Range

**Table S11.** Prediction results for log10-abundance of *V. parahaemolyticus* (unconditional expectation) using salinity lagged at 0, 1 & 2-months.

| <b>Model</b> |                       | <b>Summer</b>              |                                |                         |       |                      |        |
|--------------|-----------------------|----------------------------|--------------------------------|-------------------------|-------|----------------------|--------|
|              |                       | RMSE <sup>a</sup>          | <u>Random Cross-Validation</u> |                         | RMSE  | <u>2010 Forecast</u> |        |
|              |                       |                            | MPSE <sup>b</sup>              | CV-R2 <sup>c</sup>      |       | MPSE                 | CV-R2  |
|              |                       | Median [IQR <sup>d</sup> ] | Median [IQR]                   | Median [IQR]            |       |                      |        |
| 1            | Lag 0                 | 0.377 [0.363, 0.394]       | 0.060 [0.058, 0.062]           | -0.076 [-0.114, -0.043] | 0.553 | 0.053                | 0.015  |
| 2            | Lag 1 + Lag 2         | 0.375 [0.360, 0.391]       | 0.074 [0.071, 0.077]           | -0.058 [-0.099, -0.026] | 0.551 | 0.060                | 0.022  |
| 3            | Lag 0 + Lag 1 + Lag 2 | 0.376 [0.362, 0.393]       | 0.085 [0.081, 0.090]           | -0.068 [-0.112, -0.033] | 0.553 | 0.067                | 0.014  |
| <b>Model</b> |                       | <b>Autumn</b>              |                                |                         |       |                      |        |
|              |                       | RMSE                       | <u>Random Cross-Validation</u> |                         | RMSE  | <u>2010 Forecast</u> |        |
|              |                       |                            | MPSE                           | CV-R2                   |       | MPSE                 | CV-R2  |
|              |                       | Median [IQR]               | Median [IQR]                   | Median [IQR]            |       |                      |        |
| 1            | Lag 0                 | 0.325 [0.315, 0.335]       | 0.062 [0.060, 0.064]           | -0.087 [-0.137, -0.043] | 0.392 | 0.054                | -0.077 |
| 2            | Lag 1 + Lag 2         | 0.330 [0.319, 0.342]       | 0.080 [0.077, 0.085]           | -0.117 [-0.187, -0.069] | 0.391 | 0.062                | -0.075 |
| 3            | Lag 0 + Lag 1 + Lag 2 | 0.316 [0.305, 0.326]       | 0.095 [0.089, 0.101]           | -0.021 [-0.098, 0.045]  | 0.370 | 0.133                | 0.040  |

<sup>a</sup> Root-Mean-Squared-Error; <sup>b</sup> Mean Prediction Standard Error; <sup>c</sup> Cross-validation R<sup>2</sup>; <sup>d</sup> Interquartile Range



**Table S12.** Prediction results for log10-abundance of *V. parahaemolyticus* (unconditional expectation) using dissolved oxygen lagged at 0, 1 & 2-months.

| <b>Model</b> |                       | <b>Summer</b>        |                                |                           |                    |       |                      |        |
|--------------|-----------------------|----------------------|--------------------------------|---------------------------|--------------------|-------|----------------------|--------|
|              |                       | RMSE <sup>a</sup>    | <u>Random Cross-Validation</u> |                           | CV-R2 <sup>c</sup> | RMSE  | <u>2010 Forecast</u> |        |
|              |                       |                      | MPSE <sup>b</sup>              | Median [IQR] <sup>d</sup> |                    |       | MPSE                 | CV-R2  |
| 1            | Lag 0                 | 0.359 [0.346, 0.373] | 0.070 [0.066, 0.076]           | 0.019 [-0.054, 0.077]     |                    | 0.528 | 0.062                | 0.121  |
| 2            | Lag 1 + Lag 2         | 0.376 [0.360, 0.391] | 0.064 [0.061, 0.067]           | -0.071 [-0.127, -0.032]   |                    | 0.556 | 0.049                | 0.026  |
| 3            | Lag 0 + Lag 1 + Lag 2 | 0.361 [0.348, 0.375] | 0.083 [0.078, 0.089]           | 0.009 [-0.065, 0.069]     |                    | 0.531 | 0.066                | 0.111  |
| <b>Model</b> |                       | <b>Autumn</b>        |                                |                           |                    |       |                      |        |
|              |                       | RMSE                 | <u>Random Cross-Validation</u> |                           | CV-R2              | RMSE  | <u>2010 Forecast</u> |        |
|              |                       |                      | MPSE                           | Median [IQR]              |                    |       | MPSE                 | CV-R2  |
| 1            | Lag 0                 | 0.315 [0.303, 0.325] | 0.068 [0.064, 0.071]           | -0.083 [-0.164, -0.031]   |                    | 0.380 | 0.046                | -0.046 |
| 2            | Lag 1 + Lag 2         | 0.299 [0.290, 0.309] | 0.081 [0.077, 0.088]           | 0.010 [-0.081, 0.108]     |                    | 0.333 | 0.071                | 0.197  |
| 3            | Lag 0 + Lag 1 + Lag 2 | 0.298 [0.289, 0.308] | 0.093 [0.087, 0.099]           | 0.017 [-0.076, 0.112]     |                    | 0.328 | 0.078                | 0.218  |

<sup>a</sup> Root-Mean-Squared-Error; <sup>b</sup> Mean Prediction Standard Error; <sup>c</sup> Cross-validation R<sup>2</sup>; <sup>d</sup> Interquartile Range

**Table S13.** Prediction results for log10-abundance of *V. parahaemolyticus* (unconditional expectation) using Secchi disk depth lagged at 0, 1 & 2-months.

| <b>Model</b> |                       | <b>Summer</b>              |                                |                         |       |       |                      |  |
|--------------|-----------------------|----------------------------|--------------------------------|-------------------------|-------|-------|----------------------|--|
|              |                       | RMSE <sup>a</sup>          | <u>Random Cross-Validation</u> |                         |       | RMSE  | <u>2010 Forecast</u> |  |
|              |                       |                            | MPSE <sup>b</sup>              | CV-R2 <sup>c</sup>      | MPSE  |       | CV-R2                |  |
|              |                       | Median [IQR <sup>d</sup> ] | Median [IQR]                   | Median [IQR]            |       |       |                      |  |
| 1            | Lag 0                 | 0.378 [0.363, 0.395]       | 0.051 [0.050, 0.053]           | -0.110 [-0.150, -0.073] | 0.551 | 0.050 | 0.003                |  |
| 2            | Lag 1 + Lag 2         | 0.380 [0.364, 0.397]       | 0.056 [0.055, 0.057]           | -0.117 [-0.157, -0.082] | 0.551 | 0.052 | 0.000                |  |
| 3            | Lag 0 + Lag 1 + Lag 2 | 0.379 [0.364, 0.396]       | 0.061 [0.060, 0.063]           | -0.114 [-0.153, -0.077] | 0.551 | 0.057 | 0.001                |  |
| <b>Model</b> |                       | <b>Autumn</b>              |                                |                         |       |       |                      |  |
|              |                       | RMSE                       | <u>Random Cross-Validation</u> |                         |       | RMSE  | <u>2010 Forecast</u> |  |
|              |                       |                            | MPSE                           | CV-R2                   | MPSE  |       | CV-R2                |  |
|              |                       | Median [IQR]               | Median [IQR]                   | Median [IQR]            |       |       |                      |  |
| 1            | Lag 0                 | 0.335 [0.324, 0.347]       | 0.055 [0.053, 0.056]           | -0.165 [-0.228, -0.118] | 0.408 | 0.051 | -0.193               |  |
| 2            | Lag 1 + Lag 2         | 0.337 [0.325, 0.348]       | 0.058 [0.057, 0.060]           | -0.175 [-0.234, -0.133] | 0.407 | 0.049 | -0.190               |  |
| 3            | Lag 0 + Lag 1 + Lag 2 | 0.336 [0.324, 0.347]       | 0.064 [0.062, 0.066]           | -0.170 [-0.233, -0.122] | 0.407 | 0.061 | -0.191               |  |

<sup>a</sup> Root-Mean-Squared-Error; <sup>b</sup> Mean Prediction Standard Error; <sup>c</sup> Cross-validation R<sup>2</sup>; <sup>d</sup> Interquartile Range

**Table S14.** Prediction results for log10-abundance of *V. parahaemolyticus* (unconditional expectation) using water temperature, salinity, dissolved oxygen, and Secchi disk depth with interaction terms lagged at 0, 1 & 2-months.

| Model |                                   | <u>Summer</u>              |                                |                         |                    |       |                      |       |
|-------|-----------------------------------|----------------------------|--------------------------------|-------------------------|--------------------|-------|----------------------|-------|
|       |                                   | RMSE <sup>a</sup>          | <u>Random Cross-Validation</u> |                         | CV-R2 <sup>c</sup> | RMSE  | <u>2010 Forecast</u> |       |
|       |                                   | Median [IQR <sup>d</sup> ] | MPSE <sup>b</sup>              | MPSE <sup>b</sup>       | CV-R2 <sup>c</sup> | MPSE  | MPSE                 | CV-R2 |
| 1     | Lag 0                             | 0.324 [0.312, 0.337]       | 0.143 [0.134, 0.154]           | 0.220 [0.135, 0.297]    | 0.472              | 0.146 | 0.299                |       |
| 2     | Lag 1 + Lag 2                     | 0.330 [0.314, 0.345]       | 0.142 [0.132, 0.151]           | 0.205 [0.125, 0.267]    | 0.481              | 0.136 | 0.271                |       |
| 3     | Lag 0 + Lag 1 + Lag 2             | 0.327 [0.313, 0.343]       | 0.189 [0.176, 0.203]           | 0.201 [0.109, 0.293]    | 0.462              | 0.172 | 0.328                |       |
| 4     | Model 1 + Covariates <sup>e</sup> | 0.331 [0.314, 0.349]       | 0.215 [0.197, 0.231]           | 0.236 [0.107, 0.320]    | 0.475              | 0.331 | 0.311                |       |
| 5     | Model 2 + Covariates              | 0.332 [0.313, 0.351]       | 0.186 [0.172, 0.200]           | 0.238 [0.139, 0.323]    | 0.504              | 0.222 | 0.223                |       |
| 6     | Model 3 + Covariates              | 0.364 [0.335, 0.397]       | 0.244 [0.225, 0.267]           | 0.065 [-0.112, 0.216]   | 0.537              | 0.339 | 0.118                |       |
| Model |                                   | <u>Autumn</u>              |                                |                         |                    |       |                      |       |
|       |                                   | RMSE                       | <u>Random Cross-Validation</u> |                         | CV-R2              | RMSE  | <u>2010 Forecast</u> |       |
|       |                                   | Median [IQR]               | MPSE                           | MPSE                    | CV-R2              | MPSE  | MPSE                 | CV-R2 |
| 1     | Lag 0                             | 0.291 [0.279, 0.304]       | 0.126 [0.118, 0.136]           | 0.088 [-0.004, 0.164]   | 0.349              | 0.090 | 0.147                |       |
| 2     | Lag 1 + Lag 2                     | 0.303 [0.287, 0.325]       | 0.158 [0.147, 0.171]           | 0.007 [-0.180, 0.133]   | 0.329              | 0.092 | 0.244                |       |
| 3     | Lag 0 + Lag 1 + Lag 2             | 0.297 [0.280, 0.318]       | 0.191 [0.178, 0.208]           | 0.038 [-0.113, 0.176]   | 0.404              | 0.152 | -0.140               |       |
| 4     | Model 1 + Covariates              | 0.319 [0.294, 0.361]       | 0.198 [0.178, 0.220]           | -0.046 [-0.385, 0.108]  | 0.366              | 0.174 | 0.072                |       |
| 5     | Model 2 + Covariates              | 0.302 [0.287, 0.325]       | 0.187 [0.174, 0.201]           | 0.052 [-0.111, 0.172]   | 0.337              | 0.122 | 0.213                |       |
| 6     | Model 3 + Covariates              | 0.361 [0.330, 0.419]       | 0.240 [0.216, 0.266]           | -0.386 [-0.847, -0.096] | 0.751              | 0.398 | -2.900               |       |

<sup>a</sup> Root-Mean-Squared-Error; <sup>b</sup> Mean Prediction Standard Error; <sup>c</sup> Cross-validation R<sup>2</sup>; <sup>d</sup> Interquartile Range; <sup>e</sup> covariates include additional environmental variables described in Table S1

**Table S15.** Prediction results for log10-abundance of *V. parahaemolyticus* (unconditional expectation) using water temperature, salinity, dissolved oxygen, and Secchi disk depth (parsimonious model) lagged at 0, 1 & 2-months.

| Model |                                   | <u>Summer</u>              |                                                     |                       | <u>2010 Forecast</u> |       |       |
|-------|-----------------------------------|----------------------------|-----------------------------------------------------|-----------------------|----------------------|-------|-------|
|       |                                   | RMSE <sup>a</sup>          | <u>Random Cross-Validation</u><br>MPSE <sup>b</sup> | CV-R2 <sup>c</sup>    | RMSE                 | MPSE  | CV-R2 |
|       |                                   | Median [IQR <sup>d</sup> ] | Median [IQR]                                        | Median [IQR]          |                      |       |       |
| 1     | Lag 0                             | 0.325 [0.317, 0.337]       | 0.100 [0.093, 0.108]                                | 0.213 [0.141, 0.278]  | 0.479                | 0.106 | 0.276 |
| 2     | Lag 1 + Lag 2                     | 0.338 [0.325, 0.353]       | 0.098 [0.092, 0.105]                                | 0.154 [0.076, 0.219]  | 0.498                | 0.098 | 0.219 |
| 3     | Lag 0 + Lag 1 + Lag 2             | 0.323 [0.312, 0.333]       | 0.116 [0.108, 0.124]                                | 0.233 [0.159, 0.297]  | 0.475                | 0.115 | 0.288 |
| 4     | Model 1 + Covariates <sup>e</sup> | 0.313 [0.302, 0.326]       | 0.149 [0.138, 0.160]                                | 0.311 [0.231, 0.382]  | 0.494                | 0.179 | 0.254 |
| 5     | Model 2 + Covariates              | 0.329 [0.314, 0.344]       | 0.149 [0.138, 0.160]                                | 0.249 [0.162, 0.325]  | 0.522                | 0.158 | 0.168 |
| 6     | Model 3 + Covariates              | 0.314 [0.303, 0.327]       | 0.158 [0.147, 0.170]                                | 0.308 [0.225, 0.377]  | 0.505                | 0.174 | 0.222 |
| Model |                                   | <u>Autumn</u>              |                                                     |                       | <u>2010 Forecast</u> |       |       |
|       |                                   | RMSE                       | <u>Random Cross-Validation</u><br>MPSE              | CV-R2                 | RMSE                 | MPSE  | CV-R2 |
|       |                                   | Median [IQR]               | Median [IQR]                                        | Median [IQR]          |                      |       |       |
| 1     | Lag 0                             | 0.294 [0.283, 0.305]       | 0.085 [0.080, 0.090]                                | 0.067 [-0.016, 0.140] | 0.345                | 0.063 | 0.167 |
| 2     | Lag 1 + Lag 2                     | 0.290 [0.279, 0.302]       | 0.100 [0.093, 0.107]                                | 0.095 [-0.007, 0.177] | 0.329                | 0.083 | 0.245 |
| 3     | Lag 0 + Lag 1 + Lag 2             | 0.281 [0.271, 0.290]       | 0.104 [0.098, 0.112]                                | 0.141 [0.053, 0.223]  | 0.317                | 0.143 | 0.300 |
| 4     | Model 1 + Covariates              | 0.300 [0.288, 0.313]       | 0.129 [0.121, 0.139]                                | 0.072 [-0.022, 0.151] | 0.337                | 0.105 | 0.214 |
| 5     | Model 2 + Covariates              | 0.288 [0.274, 0.302]       | 0.141 [0.130, 0.151]                                | 0.149 [0.050, 0.232]  | 0.306                | 0.155 | 0.353 |
| 6     | Model 3 + Covariates              | 0.285 [0.274, 0.297]       | 0.141 [0.132, 0.152]                                | 0.160 [0.067, 0.236]  | 0.319                | 0.187 | 0.294 |

<sup>a</sup> Root-Mean-Squared-Error; <sup>b</sup> Mean Prediction Standard Error; <sup>c</sup> Cross-validation R<sup>2</sup>; <sup>d</sup> Interquartile Range; <sup>e</sup> covariates include additional environmental variables described in Table S1

**Table S16.** Prediction results for log<sub>10</sub>-abundance of *V. parahaemolyticus* (unconditional expectation) using water temperature, salinity, dissolved oxygen, and Secchi disk depth with interaction terms (parsimonious model) lagged at 0, 1 & 2-months.

| Model |                                   | <u>Summer</u>             |                                |                        |       |       |                      |  |
|-------|-----------------------------------|---------------------------|--------------------------------|------------------------|-------|-------|----------------------|--|
|       |                                   | RMSE <sup>a</sup>         | <u>Random Cross-Validation</u> |                        |       | RMSE  | <u>2010 Forecast</u> |  |
|       |                                   |                           | MPSE <sup>b</sup>              | CV-R2 <sup>c</sup>     | MPSE  |       | CV-R2                |  |
|       |                                   | Median [IQR] <sup>d</sup> | Median [IQR]                   | Median [IQR]           |       |       |                      |  |
| 1     | Lag 0                             | 0.323 [0.310, 0.334]      | 0.135 [0.126, 0.144]           | 0.229 [0.147, 0.306]   | 0.469 | 0.135 | 0.307                |  |
| 2     | Lag 1 + Lag 2                     | 0.328 [0.312, 0.343]      | 0.131 [0.121, 0.140]           | 0.215 [0.135, 0.274]   | 0.477 | 0.129 | 0.282                |  |
| 3     | Lag 0 + Lag 1 + Lag 2             | 0.317 [0.303, 0.329]      | 0.145 [0.136, 0.158]           | 0.259 [0.176, 0.338]   | 0.447 | 0.152 | 0.370                |  |
| 4     | Model 1 + Covariates <sup>e</sup> | 0.329 [0.312, 0.347]      | 0.209 [0.192, 0.226]           | 0.246 [0.125, 0.327]   | 0.487 | 0.305 | 0.276                |  |
| 5     | Model 2 + Covariates              | 0.331 [0.313, 0.348]      | 0.177 [0.165, 0.191]           | 0.243 [0.145, 0.317]   | 0.510 | 0.206 | 0.204                |  |
| 6     | Model 3 + Covariates              | 0.346 [0.325, 0.371]      | 0.215 [0.197, 0.234]           | 0.156 [0.036, 0.271]   | 0.468 | 0.302 | 0.332                |  |
| Model |                                   | <u>Autumn</u>             |                                |                        |       |       |                      |  |
|       |                                   | RMSE                      | <u>Random Cross-Validation</u> |                        |       | RMSE  | <u>2010 Forecast</u> |  |
|       |                                   |                           | MPSE                           | CV-R2                  | MPSE  |       | CV-R2                |  |
|       |                                   | Median [IQR]              | Median [IQR]                   | Median [IQR]           |       |       |                      |  |
| 1     | Lag 0                             | 0.291 [0.279, 0.304]      | 0.126 [0.118, 0.136]           | 0.088 [-0.004, 0.164]  | 0.349 | 0.090 | 0.147                |  |
| 2     | Lag 1 + Lag 2                     | 0.290 [0.277, 0.302]      | 0.109 [0.103, 0.118]           | 0.091 [-0.014, 0.188]  | 0.321 | 0.093 | 0.279                |  |
| 3     | Lag 0 + Lag 1 + Lag 2             | 0.277 [0.266, 0.289]      | 0.151 [0.141, 0.164]           | 0.170 [0.068, 0.254]   | 0.372 | 0.201 | 0.035                |  |
| 4     | Model 1 + Covariates              | 0.319 [0.294, 0.361]      | 0.198 [0.178, 0.220]           | -0.046 [-0.385, 0.108] | 0.366 | 0.174 | 0.072                |  |
| 5     | Model 2 + Covariates              | 0.290 [0.278, 0.304]      | 0.155 [0.143, 0.165]           | 0.136 [0.015, 0.223]   | 0.303 | 0.155 | 0.363                |  |
| 6     | Model 3 + Covariates              | 0.307 [0.284, 0.331]      | 0.204 [0.183, 0.221]           | 0.019 [-0.182, 0.169]  | 0.443 | 0.318 | -0.358               |  |

<sup>a</sup> Root-Mean-Squared-Error; <sup>b</sup> Mean Prediction Standard Error; <sup>c</sup> Cross-validation R<sup>2</sup>; <sup>d</sup> Interquartile Range; <sup>e</sup> covariates include additional environmental variables

described in Table S1
